# Supplementary material
Source: PubMed Central journal article supplement (PMC8013029)
Supplement: 14-00847.pdf [file 14-00847.pdf]

**On-line Table: Demographic data, clinical information, physical examination findings, and quantitative imaging data in patients undergoing stem cell implantation**

| Patient No. | Sex | Age (yr) | Infarct Location    | Stroke Etiology                  | Initial PE Findings                                                                                                | Post-MSC PE Findings                                                 | TRS | %BVC of MCAI |         | GLR of MCAI |         |
|-------------|-----|----------|---------------------|----------------------------------|--------------------------------------------------------------------------------------------------------------------|----------------------------------------------------------------------|-----|--------------|---------|-------------|---------|
|             |     |          |                     |                                  |                                                                                                                    |                                                                      |     | %BVC         | Control | %BVC        | Control |
| 1           | F   | 53       | Left basal ganglia  | HTN                              | Immobile RUE, decreased strength RLE                                                                               | Increased strength RLE                                               | 0.5 | -0.73        | -2.31   | 1.18        | 1.05    |
| 2           | F   | 57       | Left MCA and ACA    | Left ICA thrombus                | Right hemiplegia and aphasia                                                                                       | Increased strength RUE, increased strength RLE, can now name objects | 1   | -0.25        | 2.03    | 1.75        | 0.86    |
| 3           | M   | 63       | Right parietal lobe | Severe stenosis right ICA origin | Left visual field deficit; left facial weakness, decreased strength and sensation left upper and lower extremities | Slightly increased left sensation                                    | 0.4 | 0.26         | -1.54   | 1.42        | 0.68    |
| 4           | M   | 59       | Left MCA and ACA    | Occluded left ICA                | Right hemiplegia and aphasia                                                                                       | No change                                                            | 0   | 5.05         | -8.33   | 1.23        | 0.76    |
| 5           | M   | 77       | Right MCA           | Patent foramen ovale             | Left hemiplegia                                                                                                    | No change                                                            | 0   | -0.65        | -7.78   | 0.93        | 0.56    |

**Note:**—PE indicates physical examination; HTN, hypertension; RLE, right lower extremity; ACA, anterior cerebral artery; RUE, right upper extremity; TRS, total recovery score.
